# Supplementary material for: A multi-channel electrochemical biosensor based on polyadenine tetrahedra for the detection of multiple drug resistance genes
Source: Royal Society of Chemistry journal article supplement (doi:10.1039/d4an00488d), 2024-01-01
Supplement: d4an00488d1.pdf [file d4an00488d1.pdf]

## Supplementary Information

### **A multi-channel electrochemical biosensor based on polyadenine tetrahedra for the detection of multiple drug resistance genes**

Yanan Song,<sup>†a,b</sup> Jun Feng,<sup>†c</sup> Xueming Wang,<sup>a</sup> Yanli Wen,<sup>b</sup> Li Xu,<sup>b</sup> Yinbo Huo,<sup>b</sup> Lele Wang,<sup>b</sup> Qing Tao,<sup>b</sup> Zhenzhou Yang,<sup>b</sup> Gang Liu,<sup>b</sup> Min Chen,<sup>\*c</sup> Lanying Li<sup>\*b</sup> and Juan Yan<sup>\*a</sup>

<sup>a</sup>International Research Center for Food and Health; Laboratory of Quality and Safety Risk Assessment for Aquatic Products on Storage and Preservation (Shanghai), Ministry of Agriculture; College of Food Science and Technology, Shanghai Ocean University, Shanghai 201306, China.

E-mail: [j-yan@shou.edu.cn](mailto:j-yan@shou.edu.cn) (J. Yan)

<sup>b</sup>Laboratory of Biometrology, Division of Chemistry and Ionizing Radiation Measurement Technology, Shanghai Institute of Measurement and testing technology, Shanghai, 201203, P.R. China. E-mail: [lily@simt.com.cn](mailto:lily@simt.com.cn) (L. Li)

<sup>c</sup>Municipal Centre For Disease Control & Prevention, Shanghai 200336, China. E-mail: [chenmin@scdc.sh.cn](mailto:chenmin@scdc.sh.cn) (M. Chen)

#### Content:

1. Figure S1-S3

## Figures

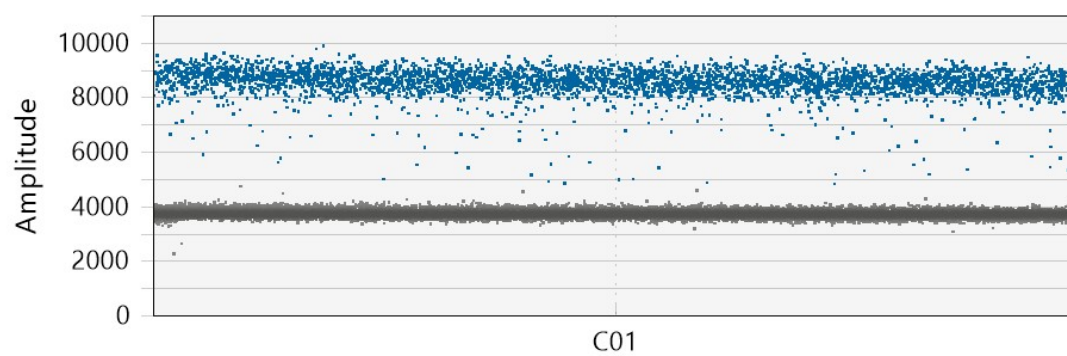

**Fig. S1** Accurate quantitative results of MCR-1 plasmid DNA.

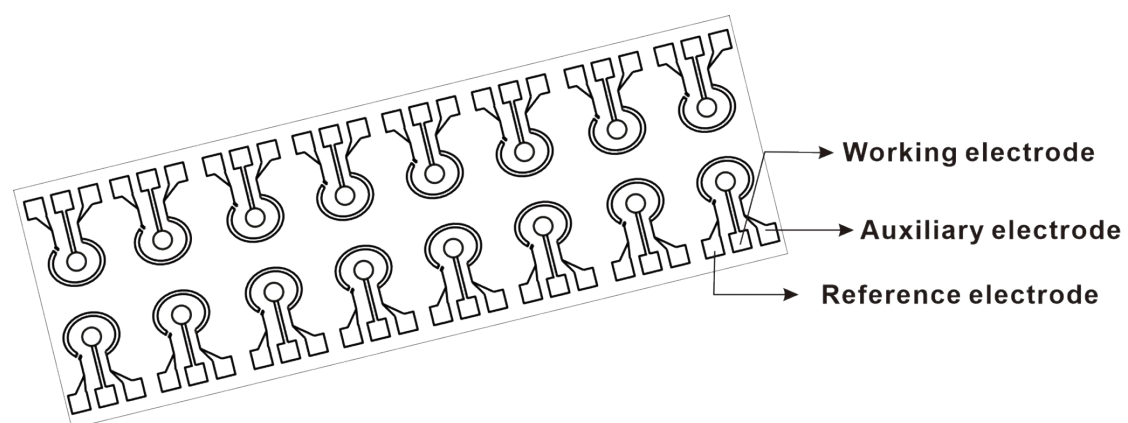

**Fig. S2** Schematic diagram of a multi-channel electrochemical chip.

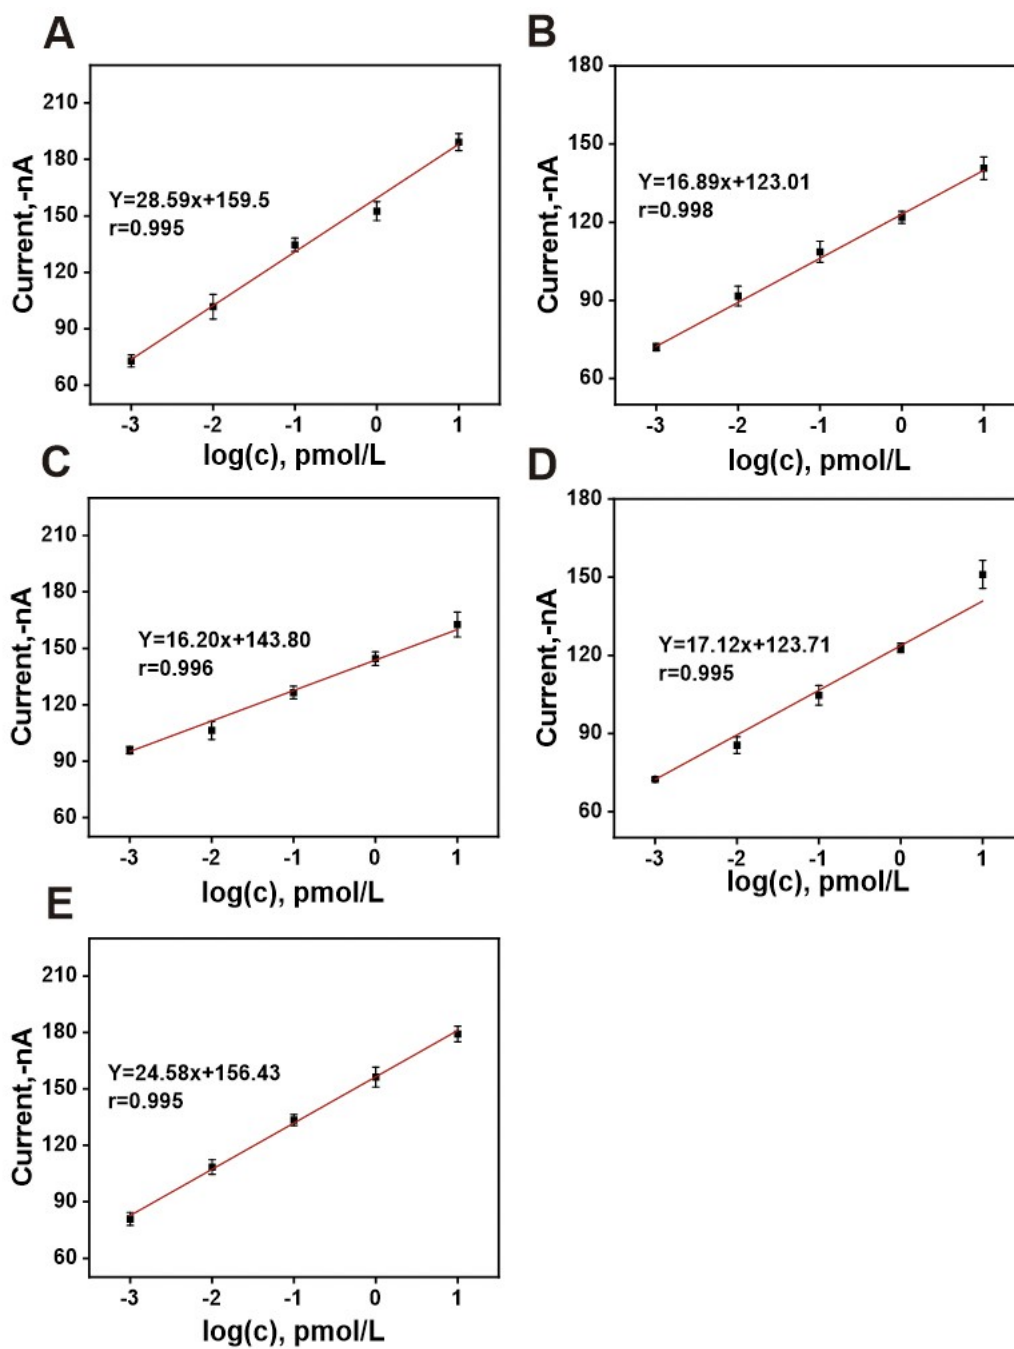

**Fig. S3** (A-E) represents the low concentration linear working curves of five resistance genes, blaNDM, blaKPC, blaIMP, blaVIM, and blaOXA, from 1 fM to 10 pM.
